# Supplementary material for: Investigation into the NO2 gas sensing behaviour of defect-induced heteroatom (N, B)-doped reduced graphene oxide-modified mesoporous MgFe2O4
Source: Royal Society of Chemistry journal article supplement (doi:10.1039/d4nj02500h), 2024-01-01
Supplement: d4nj02500h1.pdf [file d4nj02500h1.pdf]

# **Investigation into NO<sub>2</sub> Gas Sensing Behaviour of Defect Induced Heteroatom (N, B) Doped Reduced Graphene Oxide Modified Mesopores MgFe<sub>2</sub>O<sub>4</sub>**

Shital Jyotsna Sahoo<sup>a</sup>, Priyabrat Dash<sup>\*a</sup>

<sup>a</sup> *Department of Chemistry, National Institute of Technology, Rourkela, Odisha, India, 769008.*

*Email id (corresponding author): [dashp@nitrkl.ac.in](mailto:dashp@nitrkl.ac.in)*

### S1. Preparation of Graphene oxide (GO);

Primarily, GO was synthesized by following Improved Hummer's method.<sup>1</sup> Synthesis of GO was initiated by taking graphite powder (1.5 g) and mixture of  $\text{H}_2\text{SO}_4$  and  $\text{H}_3\text{PO}_4$  (180:20 ml) as starting material at 50 °C. Then, 6 g of  $\text{KMnO}_4$  was added pinch wise and let it stir for 12 h to oxidize the graphite flakes. Later, this mixture was worked up by adding 250 ml of ice water followed by addition of 3 ml of 30%  $\text{H}_2\text{O}_2$ . The obtained solution was centrifuged and washed with ethanol, deionized water and dilute HCl till neutral pH achieved and finally it was dried for 24 h to obtain GO powder. The obtained GO powder was thermally reduced at 350 °C to get reduced graphene oxide (rGO).

### S2. Preparation of N-doped GO (N-rGO);

The synthesized GO and  $\text{NH}_4\text{NO}_3$  was used as starting material to produce N-rGO as shown in scheme S1. 1:1 molar ratio of GO and  $\text{NH}_4\text{NO}_3$  were poured onto a 250 ml beaker containing 50 ml ethanol. The mixture was stirred for 30 min and then after temperature was raised to 50 °C for evaporating ethanol while stirring. The dried sample mixture was calcined at 350 °C for 1 h with a ramp rate of 5 °C/min heating rate. After cooling synthesized N-rGO was washed with ethanol and ultrapure water several times. After drying in an oven for 80 °C overnight, N-rGO was obtained.<sup>2</sup>

### S3. Preparation of B-doped GO (B-rGO);

B-rGO was synthesized by heating mixture of GO and  $\text{H}_3\text{BO}_3$  at a weight ratio of 1:1, as shown in scheme S1. Typically, 1:1 mixture of GO and  $\text{H}_3\text{BO}_3$  were mixed with 30 ml ultrapure water and sonicated for 2 h until a uniform suspension was obtained. The mixture was dried at 60 °C and further calcined at 800 °C with a heating rate of 10 °C/min for 3 h under pure Argon atmosphere to obtain B-rGO following previously reported literature.<sup>3</sup>

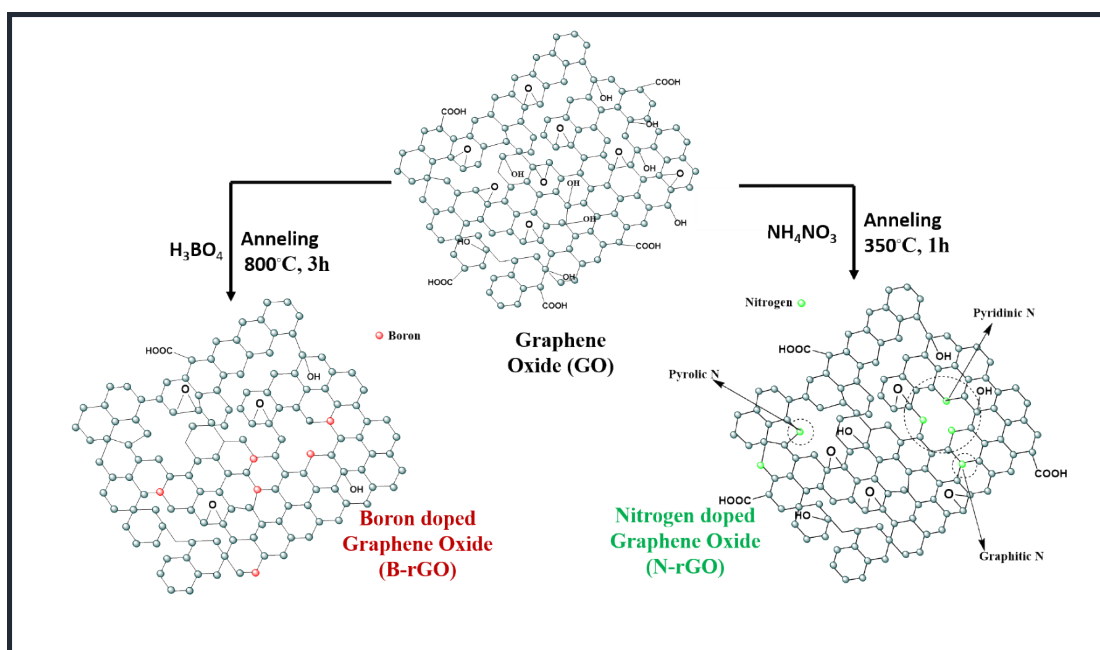

Scheme-S1: Synthesis of (N, B) rGO- $\text{MgFe}_2\text{O}_4$  nanocomposite

#### S4. Raman of MFO;

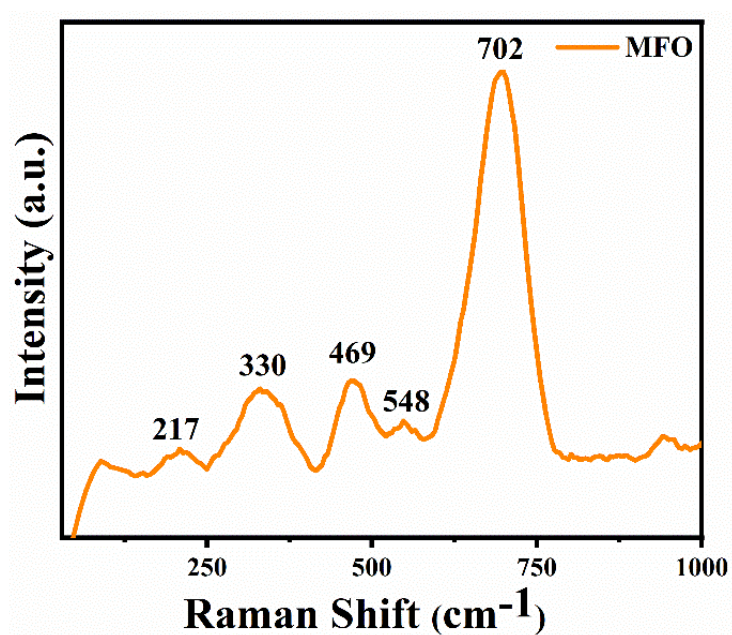

Figure S1: Raman of MFO.

#### S5. XPS of MFO;

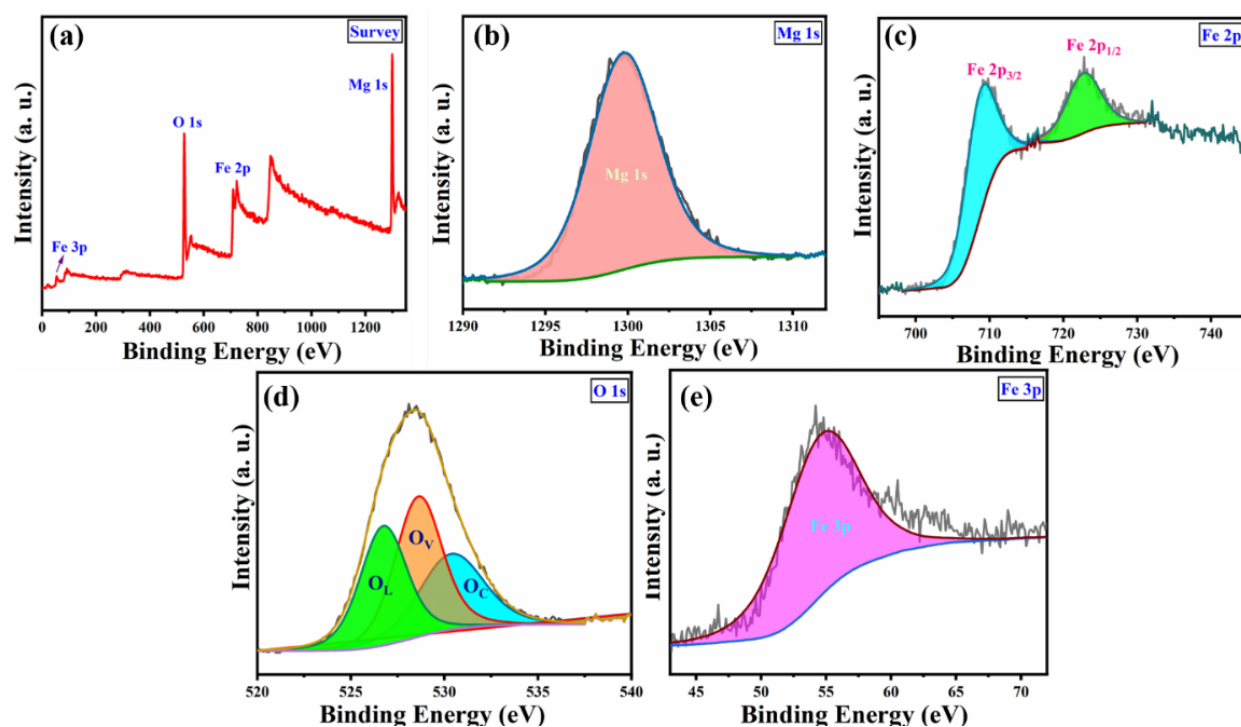

Figure S2: XPS (a) survey, (b) Mg 1s, (c) Fe 2p, (d) O 1s, and (e) Fe 3p of MFO.

# S6. Gas sensing measurement of MFO;

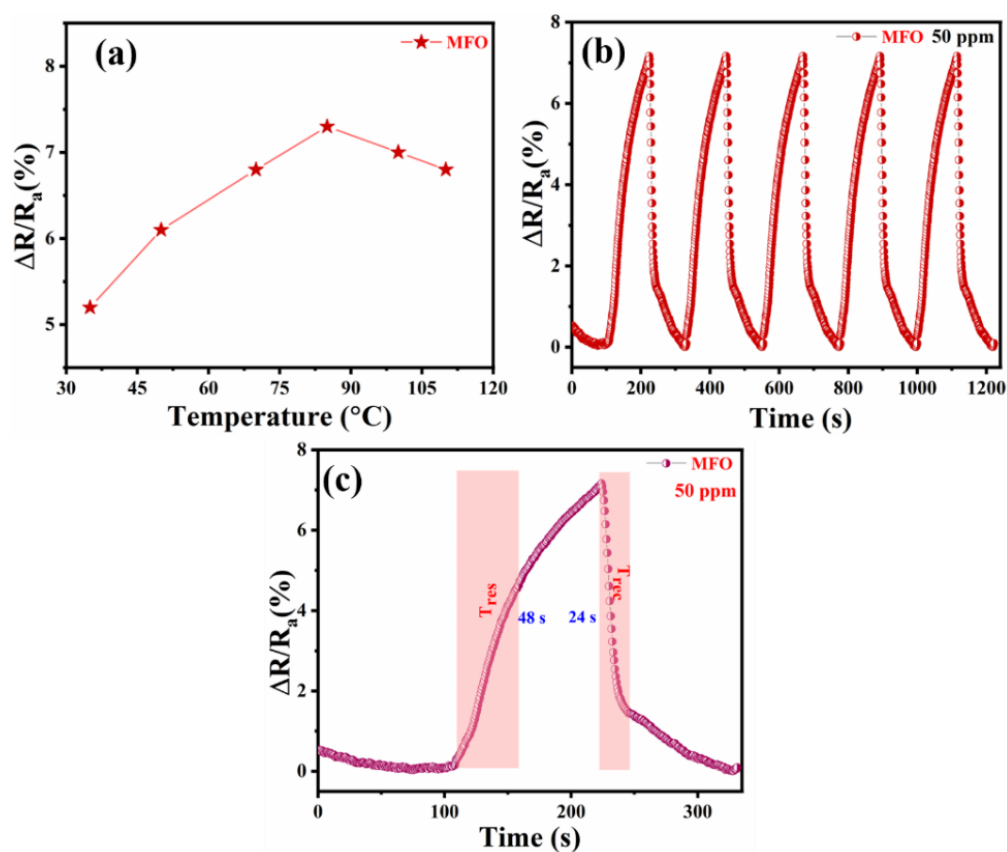

**Figure S3:** (a) Operating temperature varied response curve, (b) reproducibility, and (c) corresponding response and recovery curve of MFO towards 50 ppm NO<sub>2</sub>.

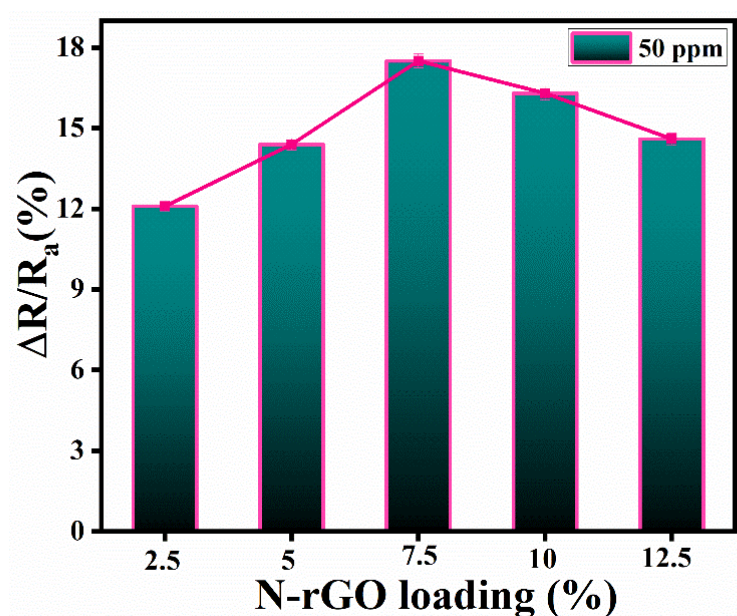

**Figure S4:** (a) Weight percentage variation responsive curve of N-rGO in N-rGO/MFO towards 50 ppm NO<sub>2</sub>.

**Table S1:** Comparison table of gas sensing performance with other reported literature

| Materials                               | NO <sub>2</sub> concentration (ppm) | S%                 | Operating Temperature (°C) | Response time | Recovery time | References       |
|-----------------------------------------|-------------------------------------|--------------------|----------------------------|---------------|---------------|------------------|
| Fe <sub>2</sub> O <sub>3</sub> /Fe@N-GC | 100                                 | 25.48 <sup>1</sup> | RT                         | 2.13s         | 11.73s        | 4                |
| γ-Fe <sub>2</sub> O <sub>3</sub> @RGO   | 100                                 | 6.86               | 200                        | 1.25s         | --            | 5                |
| ZnO-rGO                                 | 100                                 | 47.4               | RT                         | 6.2min        | 15.5min       | 6                |
| ZnS NPs/N-rGO                           | 10                                  | 2.16               | RT                         | --            | 724s          | 7                |
| Alumina-Pt/ZnO nanoparticles            | 100                                 | 18                 | 300                        | 45s           | 73s           | 8                |
| rGO-Fe <sub>3</sub> O <sub>4</sub>      | 400                                 | 24.2               | RT                         | 276s          | 738s          | 9                |
| Ag-PPy-pTSA                             | 100                                 | 68                 | RT                         | 148s          | 500s          | 10               |
| In <sub>2</sub> O <sub>3</sub> rod-rGO  | 97                                  | 2.45               | RT                         | 25s           | -             | 11               |
| <b>N-rGO/MFO</b>                        | <b>100</b>                          | <b>26.9</b>        | <b>RT</b>                  | <b>15s</b>    | <b>17s</b>    | <b>This work</b> |

1= R<sub>a</sub>/R<sub>g</sub>

## References

1. D. C. Marcano, D.V. Kosynkin, J. M. Berlin, A. Sinitskii, Z. Sun, A. Slesarev, L. B. Alemany, W. Lu, and J.M. Tour, Improved synthesis of graphene oxide. *ACS nano*, 2010, **4**, 4806-4814.
2. H. Sun, Y. Wang, S. Liu, L. Ge, L. Wang, Z. Zhu, and S. Wang, Facile synthesis of nitrogen doped reduced graphene oxide as a superior metal-free catalyst for oxidation. *Chemical Communications*, 2013, **49**, 9914-9916.
3. B. Li, F. Song, Y. Qian, J. Shaw, and Y. Rao, Boron-doped graphene oxide-supported nickel nitride nanoparticles for electrocatalytic oxygen evolution in alkaline electrolytes. *ACS Applied Nano Materials*, 2020, **3**, 9924-9930.
4. L. He, H. Wu, W. Zhang, X. Bai, J. Chen, M. Ikram, R. Wang, and K. Shi, High-dispersed Fe<sub>2</sub>O<sub>3</sub>/Fe nanoparticles residing in 3D honeycomb-like N-doped graphitic carbon as high-performance room-temperature NO<sub>2</sub> sensor. *Journal of Hazardous Materials*, 2021, **405**, 124252.
5. C. Zou, J. Hu, Y. Su, Z. Zhou, B. Cai, Z. Tao, T. Huo, N. Hu, and Y. Zhang, Highly repeatable and sensitive three-dimensional γ-Fe<sub>2</sub>O<sub>3</sub>@reduced graphene oxide gas sensors by magnetic-field assisted assembly process. *Sensors and Actuators B: Chemical*, 2020, **306**, 127546.
6. H.Y. Lee, Y.C. Heish, and C.T. Lee, High sensitivity detection of nitrogen oxide gas at room temperature using zinc oxide-reduced graphene oxide sensing membrane. *Journal of Alloys and Compounds*, 2019, **773**, 950-954.
7. X. Chen, T. Wang, Y. Han, W. Lv, B. Li, C. Su, M. Zeng, J. Yang, N. Hu, Y. Su, and Z. Yang, Wearable NO<sub>2</sub> sensing and wireless application based on ZnS nanoparticles/nitrogen-doped reduced graphene oxide. *Sensors and Actuators B: Chemical*, 2021, **345**, 130423.
8. P. Rai, and Y. T. Yu, Citrate-assisted hydrothermal synthesis of single crystalline ZnO nanoparticles for gas sensor application. *Sensors and Actuators B: Chemical*, 2012, **173**, 58-65.

9. X. Liu, J. Li, J. Sun, and X. Zhang, 3D Fe<sub>3</sub>O<sub>4</sub> nanoparticle/graphene aerogel for NO<sub>2</sub> sensing at room temperature. *RSC Advances*, 2015, **5**, 73699-73704.
10. N. Karmakar, R. Fernandes, S. Jain, U. V. Patil, N. G. Shimpi, N.V. Bhat, and D. C. Kothari, Room temperature NO<sub>2</sub> gas sensing properties of p-toluenesulfonic acid doped silver-polypyrrole nanocomposite. *Sensors and Actuators B: Chemical*, 2017, **242**, 118-126.
11. W. Fang, Y. Yang, H. Yu, X. Dong, R. Wang, T. Wang, J. Wang, Z. Liu, B. Zhao, and X. Wang, An In<sub>2</sub>O<sub>3</sub> nanorod-decorated reduced graphene oxide composite as a high-response NO<sub>x</sub> gas sensor at room temperature. *New Journal of Chemistry*, 2017, **41**, 7517-7523.
